# Supplementary material for: Evolution of Wolbachia mutualism and reproductive parasitism: insight from two novel strains that co-infect cat fleas
Source: PeerJ journal article supplement (doi:10.7717/peerj.10646), 2020-12-17

**A**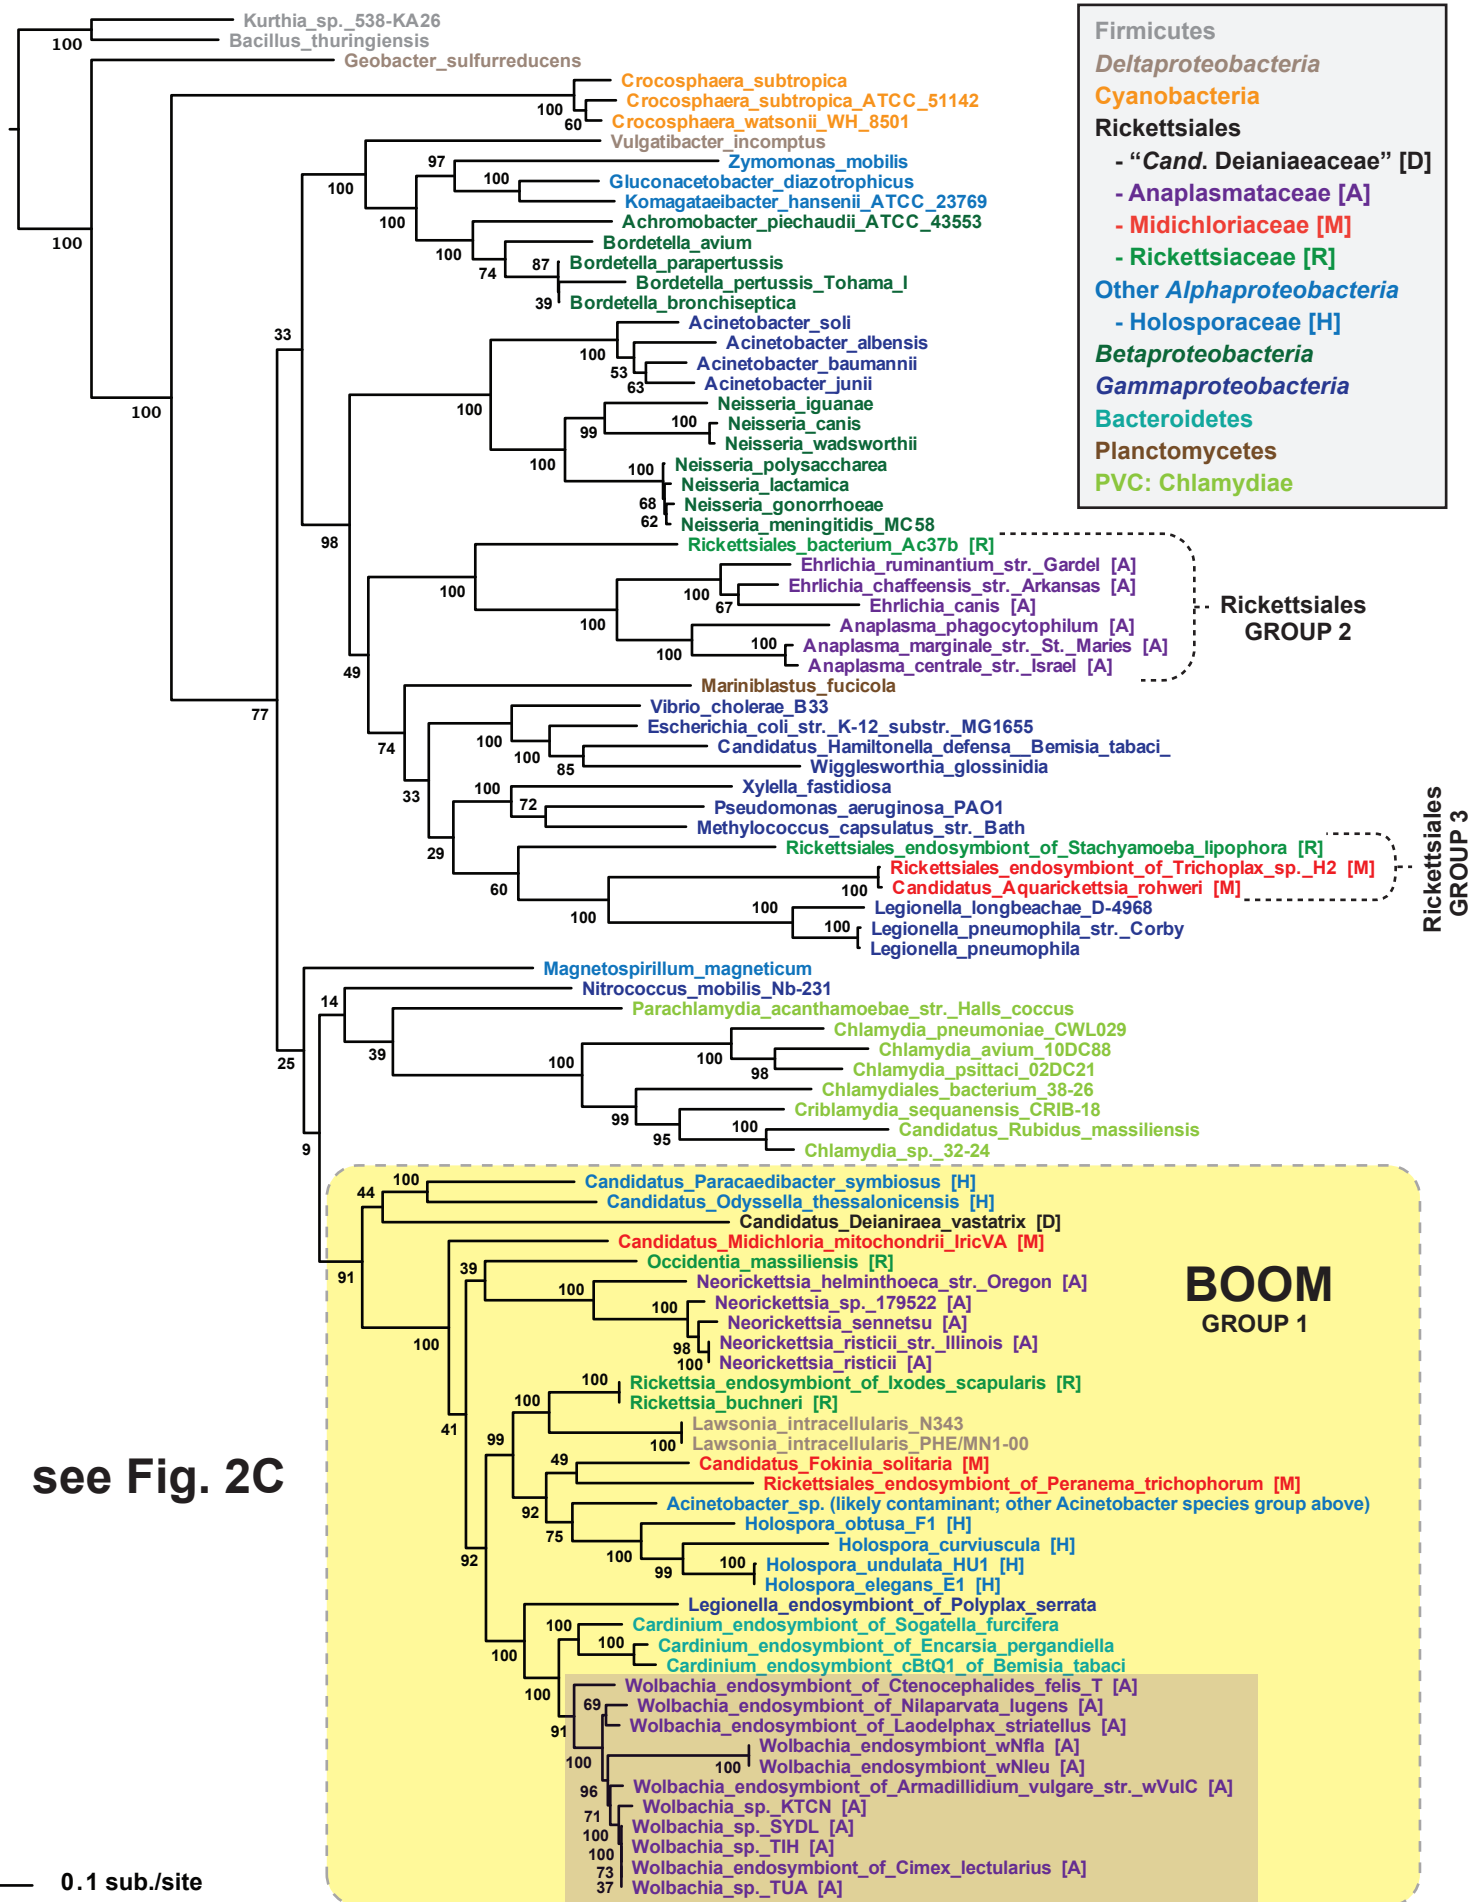

B

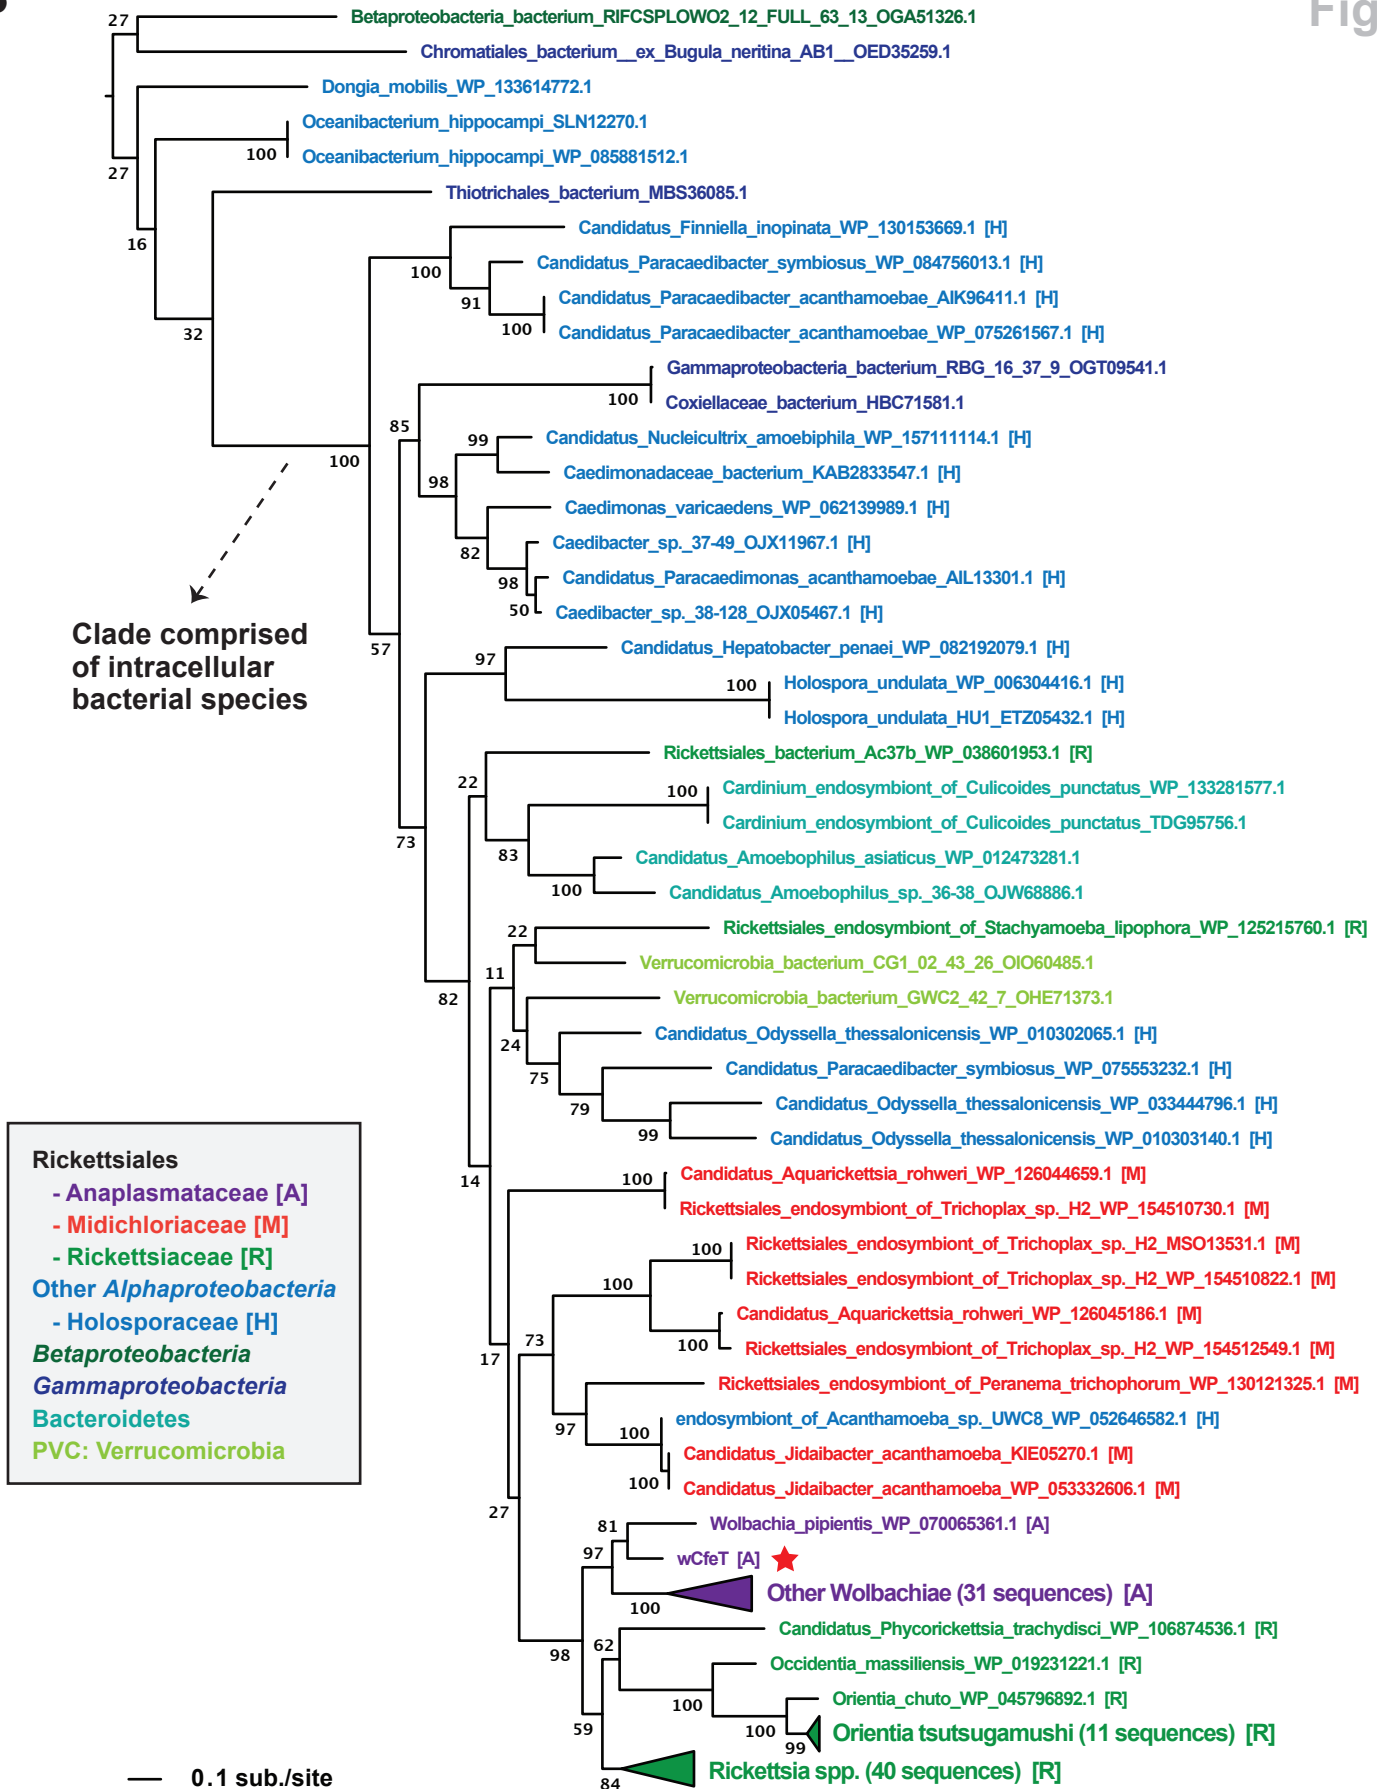

Supplement: FIGURE_S1.pdf [file FIGURE_S1.pdf]
