# Supplementary material for: Evolution of Wolbachia mutualism and reproductive parasitism: insight from two novel strains that co-infect cat fleas
Source: PeerJ journal article supplement (doi:10.7717/peerj.10646), 2020-12-17
Supplement: FIGURE_S2.pdf [file FIGURE_S2.pdf]

| wCfeT proteins |      | Top Blastp hit |      |                                            |       |            |       |         |        |  |
|----------------|------|----------------|------|--------------------------------------------|-------|------------|-------|---------|--------|--|
| Protein        | Size | Accession      | Size | Annotation                                 | Taxon | Max, tot.  | Cov.  | E value | %ID    |  |
| WP_168464803   | 309  | APR98706       | 311  | Patatin-like phospholipase                 | wFol  | 514, 514   | 100%  | 0.0     | 78.14% |  |
| WP_168464804   | 72   | AZU37351       | 74   | ParD-like family antidote                  | wBta  | 107, 107   | 97%   | 7e-29   | 72.86% |  |
| WP_168464805   | 96   | OAM00647       | 92   | RelE/ParE family toxin                     | wDacA | 154, 154   | 95%   | 5e-47   | 80.43% |  |
| -----          | 44   | -----          | ---  | -----                                      | ----- | -----      | ----- | -----   | -----  |  |
| WP_168464806   | 262  | APR98707       | 257  | PHA03095 (Ank repeats)                     | wFol  | 321, 321   | 98%   | 1e-107  | 60.31% |  |
| WP_168464807   | 82   | APR99034       | 86   | XRE family transcriptional regulator       | wFol  | 111, 111   | 97%   | 5e-30   | 68.75% |  |
| WP_168464808   | 648  | APR98618       | 651  | DNA ligase (NAD(+)) LigA                   | wFol  | 1007, 1007 | 99%   | 0.0     | 73.92% |  |
| WP_168464809   | 79   | APR97852       | 96   | XRE family transcriptional regulator       | wFol  | 139, 139   | 98%   | 4e-41   | 89.74% |  |
| WP_168464414   | 545  | WP_143688845   | 493  | Group II intron RevTranscriptase/maturase  | wStr  | 992, 992   | 89%   | 0.0     | 99.59% |  |
| WP_168464810   | 310  | APR98606       | 312  | Recombination-promoting nuclease/put. tnp  | wFol  | 506, 506   | 100%  | 3e-179  | 79.35% |  |
| WP_168464811   | 301  | APR98615       | 302  | Hypothetical protein (put. rhopty protein) | wFol  | 421, 421   | 100%  | 9e-146  | 74.17% |  |
| WP_168464812   | 226  | APR98945       | 217  | DNA repair protein RadC                    | wFol  | 367, 367   | 96%   | 7e-127  | 84.86% |  |

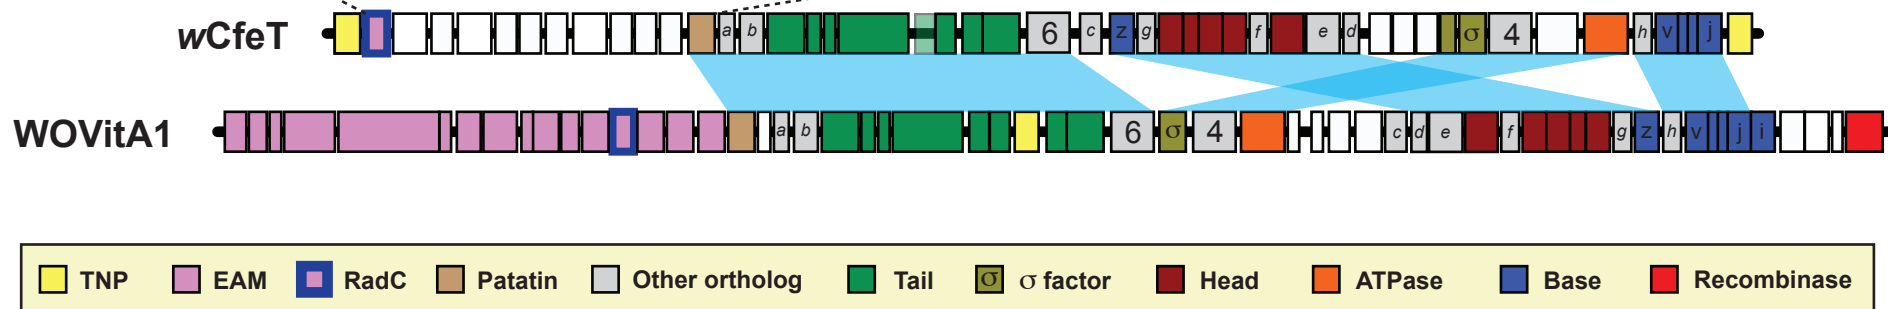

Fig. S2
