# Supplementary material for: Evolution of Wolbachia mutualism and reproductive parasitism: insight from two novel strains that co-infect cat fleas
Source: PeerJ journal article supplement (doi:10.7717/peerj.10646), 2020-12-17
Supplement: FIGURE_S3.pdf [file FIGURE_S3.pdf]

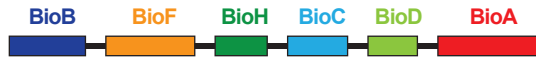

### Class I: Completely conserved gene order

Phylogenetic Group (see Figure S1A)

|                                       |  |          |
|---------------------------------------|--|----------|
| <i>Neorickettsia</i> spp.             |  | 1 "BOOM" |
| Wolbachiae                            |  | 1 "BOOM" |
| <i>Peranema trichophorum</i> endosym. |  | 1 "BOOM" |
| <i>Rickettsia buchneri</i>            |  | 1 "BOOM" |

### Class IIA: Partially conserved gene order (rogue BioA)

|                                           |  |          |
|-------------------------------------------|--|----------|
| <i>Trichoplax</i> sp. H2 endosymbiont     |  | GROUP 3  |
| " <i>Cand. Aquarickettsia rohweri</i> "   |  | GROUP 3  |
| " <i>Cand. Midichloria mitochondrii</i> " |  | 1 "BOOM" |
| <i>Stachyamoeba lipophora</i> endosym.    |  | GROUP 3  |

### Class IIB: Partially conserved gene order (rogue BioB)

|                                          |  |          |
|------------------------------------------|--|----------|
| " <i>Cand. Fokinia solitaria</i> "       |  | 1 "BOOM" |
| " <i>Cand. Occidentia massiliensis</i> " |  | 1 "BOOM" |

### Class III: No conservation of gene order

|                                           |  |          |
|-------------------------------------------|--|----------|
| " <i>Cand. Deianiraea vastatrix</i> "     |  | 1 "BOOM" |
| <i>Anaplasma marginale</i>                |  | GROUP 2  |
| <i>A. phagocytophilum</i>                 |  |          |
| <i>A. centrale</i>                        |  |          |
| <i>Ehrlichia canis</i>                    |  | GROUP 2  |
| <i>E. ruminatum</i>                       |  |          |
| <i>E. chaffeensis</i>                     |  |          |
| <i>Rickettsiales bacterium</i> str. Ac37b |  | GROUP 2  |

"*Cand. Deiania*aceae"      Midichloriaceae  
 Anaplasmataceae      Rickettsiaceae

Fig. S3
