# Supplementary material for: Evolution of Wolbachia mutualism and reproductive parasitism: insight from two novel strains that co-infect cat fleas
Source: PeerJ journal article supplement (doi:10.7717/peerj.10646), 2020-12-17
Supplement: FIGURE_S4.pdf [file FIGURE_S4.pdf]

B

|                                                | Otsu   | Nhel   | Acen   | Rtyp   | Rbuc   | R37b   | wCle   | wPip_Pel | Nlot   | Echa   |
|------------------------------------------------|--------|--------|--------|--------|--------|--------|--------|----------|--------|--------|
| ● <i>Orientia tsutsugamushi</i> Boryong (Otsu) | 100.00 |        |        |        |        |        |        |          |        |        |
| ■ <i>Neorickettsia helminthoeca</i> (Nhel)     | 31.56  | 100.00 |        |        |        |        |        |          |        |        |
| U <i>Anaplasma centrale</i> (Acen)             | 34.01  | 37.08  | 100.00 |        |        |        |        |          |        |        |
| ● <i>Rickettsia typhi</i> (Rtyp)               | 40.48  | 31.97  | 35.92  | 100.00 |        |        |        |          |        |        |
| ■ <i>Rickettsia buchneri</i> (Rbuc)            | 41.50  | 34.43  | 38.87  | 88.49  | 100.00 |        |        |          |        |        |
| <i>Rickettsiales bacterium Ac37b</i> (R37b)    | 41.11  | 37.30  | 36.90  | 46.22  | 45.85  | 100.00 |        |          |        |        |
| ■ wCle                                         | 38.21  | 40.25  | 44.90  | 37.14  | 36.73  | 44.13  | 100.00 |          |        |        |
| ● wPip_Pel                                     | 37.10  | 43.15  | 43.15  | 39.43  | 37.50  | 46.80  | 84.27  | 100.00   |        |        |
| ● <i>Neoehrlichia lotoris</i> (Nlot)           | 40.24  | 38.93  | 45.82  | 37.60  | 37.60  | 41.57  | 52.02  | 52.82    | 100.00 |        |
| U <i>Ehrlichia chaffeensis</i> (Echa)          | 41.67  | 37.45  | 45.02  | 41.37  | 39.44  | 41.96  | 52.82  | 54.98    | 60.24  | 100.00 |

C

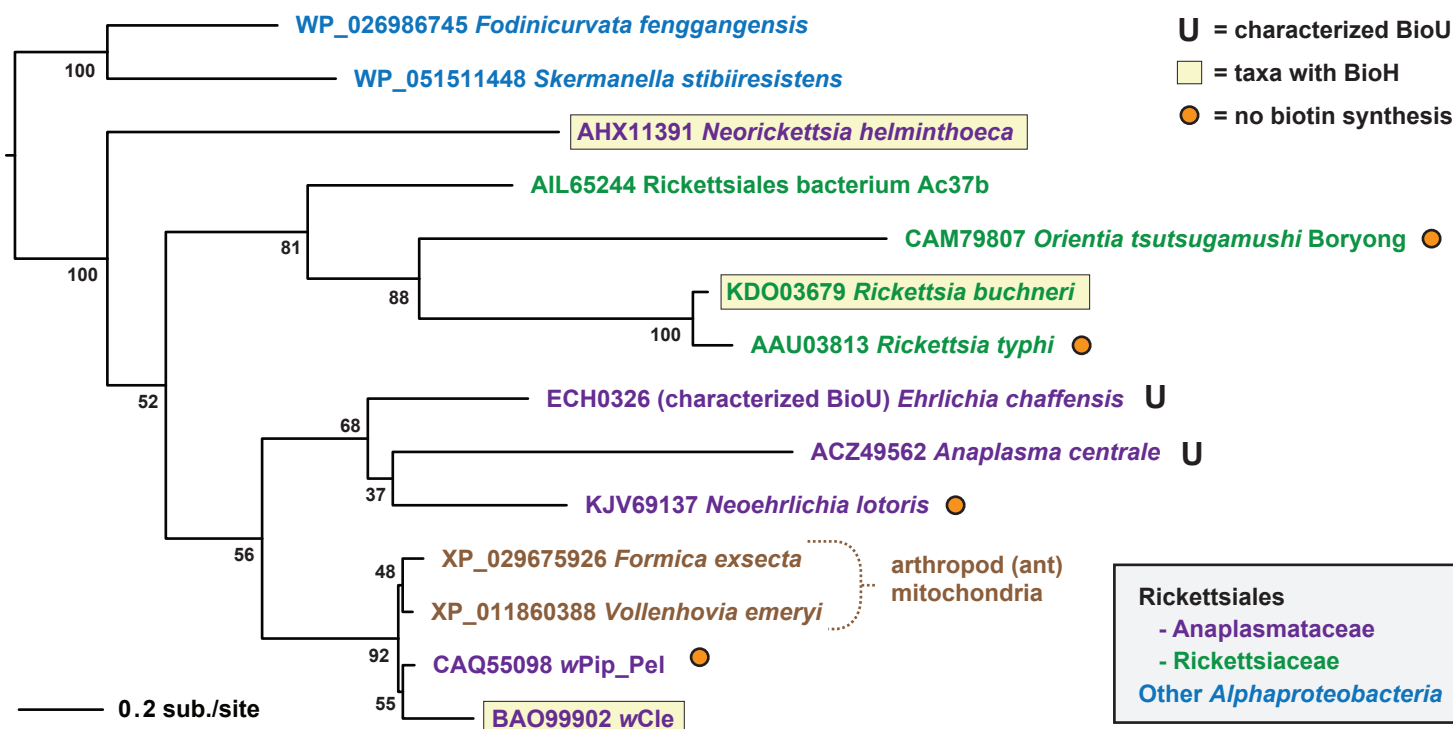

D

| NCBI taxid | Taxon                                           | Blastp results (%ID) |      |         |      |        |              |     | BioK    | BioU |
|------------|-------------------------------------------------|----------------------|------|---------|------|--------|--------------|-----|---------|------|
|            |                                                 | BioV                 | BioG | BtsA    | BioJ | BioZ * | EstN1        |     |         |      |
| 768        | Anaplasma                                       | NSS                  | NSS  | NSS     | NSS  | 33     | ~27; (2)     | NSS | Present |      |
| 943        | Ehrlichia                                       | NSS                  | NSS  | NSS     | NSS  | 33     | ~27; (2)     | NSS | Present |      |
| 2021221    | Rickettsiales endosymbiont of Trichoplax sp. H2 | NSS                  | NSS  | NSS     | NSS  | 33     | NSS          | NSS | NSS     |      |
| 2602574    | Ca. Aquarickettsia rohweri                      | NSS                  | NSS  | NSS     | NSS  | 33     | NSS          | NSS | NSS     |      |
| 1528098    | Rickettsiales bacterium Ac37b                   | NSS                  | NSS  | NSS     | NSS  | 35     | 31; AIL65750 | NSS | Present |      |
| 752179     | Occidentia massiliensis                         | NSS                  | NSS  | NSS     | NSS  | 35     | NSS          | NSS | NSS     |      |
| 2163644    | Ca. Deianiraea vastatrix                        | NSS                  | NSS  | 37; (1) | NSS  | 30     | NSS          | NSS | NSS     |      |

(1) QED23496 (5-methyltetrahydropteroyltrimethylglutamate--homocysteine S-methyltransferase); only 12% query coverage

\* % similarity to FabH; BioZ is similar to FabH but was able to complement *E. coli*  $\Delta$ bioH mutants (PMID: 11320134).

(2) similarity to a cohort of MhpC-like Abhydrolase 5 proteins (unrelated to BioU; *E. chaffeensis* Arkansas protein is ECH\_0221).
